# Supplementary material for: The Phonetics of Tone and Voice Quality Interactions in Sylheti
Source: MDPI journal article supplement (doi:10.3390/languages6040154), 2021-09-23
Supplement: s1 [file s1]

## Supplementary Section: The phonetics of tone and voice quality interactions in Sylheti

The one-way ANOVA is done for all the parameters (CPP, Energy, H1\*-H2\*, H1\*-A1\*, H1\*-A2\*, and H1\*-A3\*) in SPSS (version 26). The  $p < 0.05$  is considered to be significant in our study. The summary results are given below in Table T1-T12.

**Table T1: ANOVA\_CPP\_F**

|        |                | Sum of<br>Squares | df  | Mean Square | F     | Sig. |
|--------|----------------|-------------------|-----|-------------|-------|------|
| CPP_T1 | Between Groups | 9.089             | 1   | 9.089       | .513  | .476 |
|        | Within Groups  | 1897.083          | 107 | 17.730      |       |      |
|        | Total          | 1906.172          | 108 |             |       |      |
| CPP_T2 | Between Groups | .378              | 1   | .378        | .032  | .858 |
|        | Within Groups  | 1253.705          | 107 | 11.717      |       |      |
|        | Total          | 1254.083          | 108 |             |       |      |
| CPP_T3 | Between Groups | 3.648             | 1   | 3.648       | .643  | .424 |
|        | Within Groups  | 606.713           | 107 | 5.670       |       |      |
|        | Total          | 610.361           | 108 |             |       |      |
| CPP_T4 | Between Groups | 7.725             | 1   | 7.725       | 2.170 | .144 |
|        | Within Groups  | 380.883           | 107 | 3.560       |       |      |
|        | Total          | 388.608           | 108 |             |       |      |
| CPP_T5 | Between Groups | 2.638             | 1   | 2.638       | .699  | .405 |
|        | Within Groups  | 404.022           | 107 | 3.776       |       |      |
|        | Total          | 406.660           | 108 |             |       |      |
| CPP_T6 | Between Groups | .029              | 1   | .029        | .007  | .936 |

|        |                |          |     |        |       |      |
|--------|----------------|----------|-----|--------|-------|------|
|        | Within Groups  | 475.803  | 107 | 4.447  |       |      |
|        | Total          | 475.832  | 108 |        |       |      |
|        |                |          |     |        |       |      |
| CPP_T7 | Between Groups | .150     | 1   | .150   | .030  | .862 |
|        | Within Groups  | 533.387  | 107 | 4.985  |       |      |
|        | Total          | 533.538  | 108 |        |       |      |
| CPP_T8 | Between Groups | 5.217    | 1   | 5.217  | .683  | .411 |
|        | Within Groups  | 817.679  | 107 | 7.642  |       |      |
|        | Total          | 822.896  | 108 |        |       |      |
| CPP_T9 | Between Groups | 46.719   | 1   | 46.719 | 4.348 | .039 |
|        | Within Groups  | 1149.763 | 107 | 10.745 |       |      |
|        | Total          | 1196.482 | 108 |        |       |      |

**Table T2: ANOVA\_Energy\_F**

|           |                | Sum of Squares | df | Mean Square | F    | Sig. |
|-----------|----------------|----------------|----|-------------|------|------|
| Energy_T1 | Between Groups | 1320.578       | 1  | 1320.578    | .562 | .456 |
|           | Within Groups  | 183400.430     | 78 | 2351.288    |      |      |
|           | Total          | 184721.008     | 79 |             |      |      |
| Energy_T2 | Between Groups | 506.474        | 1  | 506.474     | .227 | .635 |
|           | Within Groups  | 174249.909     | 78 | 2233.973    |      |      |
|           | Total          | 174756.383     | 79 |             |      |      |
| Energy_T3 | Between Groups | 22.336         | 1  | 22.336      | .010 | .920 |
|           | Within Groups  | 170853.894     | 78 | 2190.435    |      |      |
|           | Total          | 170876.230     | 79 |             |      |      |
| Energy_T4 | Between Groups | 105.991        | 1  | 105.991     | .047 | .829 |
|           | Within Groups  | 175995.565     | 78 | 2256.353    |      |      |
|           | Total          | 176101.557     | 79 |             |      |      |
| Energy_T5 | Between Groups | 160.041        | 1  | 160.041     | .068 | .795 |
|           | Within Groups  | 183688.917     | 78 | 2354.986    |      |      |
|           | Total          | 183848.958     | 79 |             |      |      |
| Energy_T6 | Between Groups | 138.091        | 1  | 138.091     | .061 | .806 |
|           | Within Groups  | 176519.350     | 78 | 2263.069    |      |      |
|           | Total          | 176657.441     | 79 |             |      |      |
| Energy_T7 | Between Groups | 295.511        | 1  | 295.511     | .139 | .710 |
|           | Within Groups  | 166040.345     | 78 | 2128.722    |      |      |
|           | Total          | 166335.856     | 79 |             |      |      |
| Energy_T8 | Between Groups | 458.825        | 1  | 458.825     | .217 | .643 |
|           | Within Groups  | 164836.130     | 78 | 2113.284    |      |      |

|           |                |            |    |          |      |      |
|-----------|----------------|------------|----|----------|------|------|
|           | Total          | 165294.956 | 79 |          |      |      |
| Energy_T9 | Between Groups | 33.788     | 1  | 33.788   | .015 | .901 |
|           | Within Groups  | 170381.848 | 78 | 2184.383 |      |      |
|           | Total          | 170415.636 | 79 |          |      |      |

**Table T3: ANOVA\_CPP\_M**

|        |                | Sum of<br>Squares | df  | Mean Square | F      | Sig. |
|--------|----------------|-------------------|-----|-------------|--------|------|
| CPP_T1 | Between Groups | 14.943            | 1   | 14.943      | 1.302  | .256 |
|        | Within Groups  | 1228.277          | 107 | 11.479      |        |      |
|        | Total          | 1243.221          | 108 |             |        |      |
| CPP_T2 | Between Groups | 34.174            | 1   | 34.174      | 3.193  | .077 |
|        | Within Groups  | 1145.117          | 107 | 10.702      |        |      |
|        | Total          | 1179.291          | 108 |             |        |      |
| CPP_T5 | Between Groups | 143.653           | 1   | 143.653     | 15.483 | .000 |
|        | Within Groups  | 992.786           | 107 | 9.278       |        |      |
|        | Total          | 1136.439          | 108 |             |        |      |
| CPP_T3 | Between Groups | 85.544            | 1   | 85.544      | 8.450  | .004 |
|        | Within Groups  | 1083.207          | 107 | 10.123      |        |      |
|        | Total          | 1168.751          | 108 |             |        |      |
| CPP_T4 | Between Groups | 104.799           | 1   | 104.799     | 11.128 | .001 |
|        | Within Groups  | 1007.686          | 107 | 9.418       |        |      |
|        | Total          | 1112.485          | 108 |             |        |      |
| CPP_T6 | Between Groups | 145.068           | 1   | 145.068     | 13.549 | .000 |
|        | Within Groups  | 1145.660          | 107 | 10.707      |        |      |
|        | Total          | 1290.728          | 108 |             |        |      |

|        |                |          |     |         |        |      |
|--------|----------------|----------|-----|---------|--------|------|
| CPP_T7 | Between Groups | 252.202  | 1   | 252.202 | 25.268 | .000 |
|        | Within Groups  | 1067.977 | 107 | 9.981   |        |      |
|        | Total          | 1320.178 | 108 |         |        |      |
| CPP_T8 | Between Groups | 222.886  | 1   | 222.886 | 20.726 | .000 |
|        | Within Groups  | 1150.680 | 107 | 10.754  |        |      |
|        | Total          | 1373.566 | 108 |         |        |      |
| CPP_T9 | Between Groups | 116.212  | 1   | 116.212 | 10.380 | .002 |
|        | Within Groups  | 1197.953 | 107 | 11.196  |        |      |
|        | Total          | 1314.165 | 108 |         |        |      |

**Table T4: ANOVA\_Energy\_M**

|           |                | Sum of Squares | df  | Mean Square | F     | Sig. |
|-----------|----------------|----------------|-----|-------------|-------|------|
| Energy_T1 | Between Groups | 8734.154       | 1   | 8734.154    | 1.555 | .215 |
|           | Within Groups  | 600999.866     | 107 | 5616.821    |       |      |
|           | Total          | 609734.020     | 108 |             |       |      |
| Energy_T2 | Between Groups | 3306.924       | 1   | 3306.924    | .615  | .435 |
|           | Within Groups  | 575269.098     | 107 | 5376.347    |       |      |
|           | Total          | 578576.021     | 108 |             |       |      |
| Energy_T3 | Between Groups | 2177.054       | 1   | 2177.054    | .420  | .518 |
|           | Within Groups  | 554029.067     | 107 | 5177.842    |       |      |
|           | Total          | 556206.121     | 108 |             |       |      |
| Energy_T4 | Between Groups | 1519.094       | 1   | 1519.094    | .297  | .587 |
|           | Within Groups  | 546465.090     | 107 | 5107.150    |       |      |
|           | Total          | 547984.183     | 108 |             |       |      |
| Energy_T5 | Between Groups | 762.004        | 1   | 762.004     | .161  | .689 |
|           | Within Groups  | 505079.780     | 107 | 4720.372    |       |      |
|           | Total          | 505841.785     | 108 |             |       |      |
| Energy_T6 | Between Groups | 233.868        | 1   | 233.868     | .055  | .815 |
|           | Within Groups  | 453089.857     | 107 | 4234.485    |       |      |
|           | Total          | 453323.726     | 108 |             |       |      |
| Energy_T7 | Between Groups | .007           | 1   | .007        | .000  | .999 |
|           | Within Groups  | 411109.745     | 107 | 3842.147    |       |      |
|           | Total          | 411109.751     | 108 |             |       |      |
| Energy_T8 | Between Groups | 6.569          | 1   | 6.569       | .002  | .966 |
|           | Within Groups  | 393854.422     | 107 | 3680.882    |       |      |
|           | Total          | 393860.992     | 108 |             |       |      |
| Energy_T9 | Between Groups | 193.145        | 1   | 193.145     | .047  | .829 |
|           | Within Groups  | 442746.869     | 107 | 4137.821    |       |      |

|  |       |            |     |  |  |  |
|--|-------|------------|-----|--|--|--|
|  | Total | 442940.014 | 108 |  |  |  |
|--|-------|------------|-----|--|--|--|

**Table T5: ANOVA\_H1\*-H2\*\_F**

|         |                | Sum of Squares | df | Mean Square | F      | Sig. |
|---------|----------------|----------------|----|-------------|--------|------|
| H1H2_T1 | Between Groups | 196.076        | 1  | 196.076     | 12.520 | .001 |
|         | Within Groups  | 1221.590       | 78 | 15.661      |        |      |
|         | Total          | 1417.666       | 79 |             |        |      |
| H1H2_T2 | Between Groups | 182.055        | 1  | 182.055     | 12.534 | .001 |
|         | Within Groups  | 1132.935       | 78 | 14.525      |        |      |
|         | Total          | 1314.990       | 79 |             |        |      |
| H1H2_T3 | Between Groups | 171.121        | 1  | 171.121     | 13.461 | .000 |
|         | Within Groups  | 991.560        | 78 | 12.712      |        |      |
|         | Total          | 1162.681       | 79 |             |        |      |
| H1H2_T4 | Between Groups | 181.390        | 1  | 181.390     | 13.948 | .000 |
|         | Within Groups  | 1014.333       | 78 | 13.004      |        |      |
|         | Total          | 1195.723       | 79 |             |        |      |
| H1H2_T5 | Between Groups | 54.148         | 1  | 54.148      | 4.052  | .048 |
|         | Within Groups  | 1042.283       | 78 | 13.363      |        |      |
|         | Total          | 1096.432       | 79 |             |        |      |
| H1H2_T6 | Between Groups | 7.780          | 1  | 7.780       | .408   | .525 |
|         | Within Groups  | 1485.628       | 78 | 19.047      |        |      |
|         | Total          | 1493.409       | 79 |             |        |      |
| H1H2_T7 | Between Groups | 2.968          | 1  | 2.968       | .185   | .668 |
|         | Within Groups  | 1248.977       | 78 | 16.013      |        |      |
|         | Total          | 1251.945       | 79 |             |        |      |
| H1H2_T8 | Between Groups | 12.096         | 1  | 12.096      | .673   | .415 |
|         | Within Groups  | 1402.702       | 78 | 17.983      |        |      |
|         | Total          | 1414.798       | 79 |             |        |      |
| H1H2_T9 | Between Groups | .410           | 1  | .410        | .020   | .887 |

|  |               |          |    |        |  |  |
|--|---------------|----------|----|--------|--|--|
|  | Within Groups | 1578.782 | 78 | 20.241 |  |  |
|  | Total         | 1579.192 | 79 |        |  |  |

**Table T6: ANOVA\_H1\*-A1\*\_F**

|         |                | Sum of Squares | df | Mean Square | F      | Sig. |
|---------|----------------|----------------|----|-------------|--------|------|
| H1A1_T1 | Between Groups | .002           | 1  | .002        | .000   | .997 |
|         | Within Groups  | 11492.594      | 78 | 147.341     |        |      |
|         | Total          | 11492.597      | 79 |             |        |      |
| H1A1_T2 | Between Groups | 7.495          | 1  | 7.495       | .064   | .800 |
|         | Within Groups  | 9086.024       | 78 | 116.487     |        |      |
|         | Total          | 9093.520       | 79 |             |        |      |
| H1A1_T3 | Between Groups | 34.967         | 1  | 34.967      | .541   | .464 |
|         | Within Groups  | 5038.664       | 78 | 64.598      |        |      |
|         | Total          | 5073.631       | 79 |             |        |      |
| H1A1_T4 | Between Groups | 76.206         | 1  | 76.206      | 2.042  | .157 |
|         | Within Groups  | 2910.870       | 78 | 37.319      |        |      |
|         | Total          | 2987.076       | 79 |             |        |      |
| H1A1_T5 | Between Groups | 270.353        | 1  | 270.353     | 11.687 | .001 |
|         | Within Groups  | 1804.436       | 78 | 23.134      |        |      |
|         | Total          | 2074.789       | 79 |             |        |      |
| H1A1_T6 | Between Groups | 309.414        | 1  | 309.414     | 14.079 | .000 |
|         | Within Groups  | 1714.228       | 78 | 21.977      |        |      |
|         | Total          | 2023.642       | 79 |             |        |      |
| H1A1_T7 | Between Groups | 156.639        | 1  | 156.639     | 7.059  | .010 |
|         | Within Groups  | 1730.865       | 78 | 22.191      |        |      |
|         | Total          | 1887.504       | 79 |             |        |      |
| H1A1_T8 | Between Groups | 199.940        | 1  | 199.940     | 5.576  | .021 |
|         | Within Groups  | 2796.760       | 78 | 35.856      |        |      |

|         |                |          |    |        |       |      |
|---------|----------------|----------|----|--------|-------|------|
|         | Total          | 2996.699 | 79 |        |       |      |
| H1A1_T9 | Between Groups | 62.720   | 1  | 62.720 | 1.213 | .274 |
|         | Within Groups  | 4033.946 | 78 | 51.717 |       |      |
|         | Total          | 4096.667 | 79 |        |       |      |

**Table T7: ANOVA\_H1\*-A2\*\_F**

|         |                | Sum of Squares | df | Mean Square | F      | Sig. |
|---------|----------------|----------------|----|-------------|--------|------|
| H1A2_T1 | Between Groups | 55.419         | 1  | 55.419      | .524   | .471 |
|         | Within Groups  | 8247.441       | 78 | 105.736     |        |      |
|         | Total          | 8302.860       | 79 |             |        |      |
| H1A2_T2 | Between Groups | 182.432        | 1  | 182.432     | 1.982  | .163 |
|         | Within Groups  | 7177.741       | 78 | 92.022      |        |      |
|         | Total          | 7360.173       | 79 |             |        |      |
| H1A2_T3 | Between Groups | 230.452        | 1  | 230.452     | 2.324  | .131 |
|         | Within Groups  | 7734.397       | 78 | 99.159      |        |      |
|         | Total          | 7964.850       | 79 |             |        |      |
| H1A2_T4 | Between Groups | 501.759        | 1  | 501.759     | 5.185  | .026 |
|         | Within Groups  | 7548.063       | 78 | 96.770      |        |      |
|         | Total          | 8049.822       | 79 |             |        |      |
| H1A2_T5 | Between Groups | 939.403        | 1  | 939.403     | 10.532 | .002 |
|         | Within Groups  | 6957.547       | 78 | 89.199      |        |      |
|         | Total          | 7896.950       | 79 |             |        |      |
| H1A2_T6 | Between Groups | 917.634        | 1  | 917.634     | 12.577 | .001 |
|         | Within Groups  | 5690.849       | 78 | 72.960      |        |      |
|         | Total          | 6608.482       | 79 |             |        |      |
| H1A2_T7 | Between Groups | 481.671        | 1  | 481.671     | 9.345  | .003 |
|         | Within Groups  | 4020.153       | 78 | 51.540      |        |      |
|         | Total          | 4501.824       | 79 |             |        |      |
| H1A2_T8 | Between Groups | 441.169        | 1  | 441.169     | 8.039  | .006 |
|         | Within Groups  | 4280.698       | 78 | 54.881      |        |      |

|         |                |          |    |        |       |      |
|---------|----------------|----------|----|--------|-------|------|
|         | Total          | 4721.867 | 79 |        |       |      |
| H1A2_T9 | Between Groups | 86.598   | 1  | 86.598 | 1.277 | .262 |
|         | Within Groups  | 5289.872 | 78 | 67.819 |       |      |
|         | Total          | 5376.470 | 79 |        |       |      |

**Table T8: ANOVA\_H1\*-A3\*\_F**

|         |                | Sum of Squares | df | Mean Square | F      | Sig. |
|---------|----------------|----------------|----|-------------|--------|------|
| H1A3_T1 | Between Groups | 46.623         | 1  | 46.623      | .407   | .526 |
|         | Within Groups  | 8943.752       | 78 | 114.663     |        |      |
|         | Total          | 8990.375       | 79 |             |        |      |
| H1A3_T2 | Between Groups | 158.956        | 1  | 158.956     | 1.674  | .200 |
|         | Within Groups  | 7407.538       | 78 | 94.968      |        |      |
|         | Total          | 7566.494       | 79 |             |        |      |
| H1A3_T3 | Between Groups | 474.065        | 1  | 474.065     | 5.518  | .021 |
|         | Within Groups  | 6701.259       | 78 | 85.914      |        |      |
|         | Total          | 7175.324       | 79 |             |        |      |
| H1A3_T4 | Between Groups | 1112.783       | 1  | 1112.783    | 11.066 | .001 |
|         | Within Groups  | 7843.305       | 78 | 100.555     |        |      |
|         | Total          | 8956.088       | 79 |             |        |      |
| H1A3_T5 | Between Groups | 1828.244       | 1  | 1828.244    | 15.415 | .000 |
|         | Within Groups  | 9250.974       | 78 | 118.602     |        |      |
|         | Total          | 11079.217      | 79 |             |        |      |
| H1A3_T6 | Between Groups | 1642.623       | 1  | 1642.623    | 15.341 | .000 |
|         | Within Groups  | 8351.901       | 78 | 107.076     |        |      |
|         | Total          | 9994.524       | 79 |             |        |      |
| H1A3_T7 | Between Groups | 1370.119       | 1  | 1370.119    | 13.899 | .000 |
|         | Within Groups  | 7689.008       | 78 | 98.577      |        |      |
|         | Total          | 9059.126       | 79 |             |        |      |
| H1A3_T8 | Between Groups | 1135.332       | 1  | 1135.332    | 16.271 | .000 |



|         |                |          |    |         |       |      |
|---------|----------------|----------|----|---------|-------|------|
|         | Within Groups  | 5442.472 | 78 | 69.775  |       |      |
|         | Total          | 6577.804 | 79 |         |       |      |
|         |                |          |    |         |       |      |
| H1A3_T9 | Between Groups | 267.160  | 1  | 267.160 | 5.135 | .026 |
|         | Within Groups  | 4057.766 | 78 | 52.023  |       |      |
|         | Total          | 4324.925 | 79 |         |       |      |

**Table T9: ANOVA\_H1\*-H2\*\_M**

|         |                | Sum of Squares | df  | Mean Square | F    | Sig. |
|---------|----------------|----------------|-----|-------------|------|------|
| H1H2_T1 | Between Groups | 3.651          | 1   | 3.651       | .191 | .663 |
|         | Within Groups  | 2043.068       | 107 | 19.094      |      |      |
|         | Total          | 2046.719       | 108 |             |      |      |
| H1H2_T2 | Between Groups | 3.260          | 1   | 3.260       | .191 | .663 |
|         | Within Groups  | 1828.981       | 107 | 17.093      |      |      |
|         | Total          | 1832.241       | 108 |             |      |      |
| H1H2_T3 | Between Groups | 12.210         | 1   | 12.210      | .712 | .401 |
|         | Within Groups  | 1834.616       | 107 | 17.146      |      |      |
|         | Total          | 1846.827       | 108 |             |      |      |
| H1H2_T4 | Between Groups | 3.946          | 1   | 3.946       | .252 | .617 |
|         | Within Groups  | 1675.909       | 107 | 15.663      |      |      |
|         | Total          | 1679.856       | 108 |             |      |      |
| H1H2_T5 | Between Groups | 4.016          | 1   | 4.016       | .233 | .630 |
|         | Within Groups  | 1840.921       | 107 | 17.205      |      |      |
|         | Total          | 1844.938       | 108 |             |      |      |
| H1H2_T6 | Between Groups | 10.378         | 1   | 10.378      | .603 | .439 |
|         | Within Groups  | 1840.737       | 107 | 17.203      |      |      |
|         | Total          | 1851.115       | 108 |             |      |      |
| H1H2_T7 | Between Groups | 10.666         | 1   | 10.666      | .588 | .445 |
|         | Within Groups  | 1939.545       | 107 | 18.127      |      |      |
|         | Total          | 1950.211       | 108 |             |      |      |

|         |                |          |     |        |      |      |
|---------|----------------|----------|-----|--------|------|------|
| H1H2_T8 | Between Groups | .843     | 1   | .843   | .042 | .838 |
|         | Within Groups  | 2141.208 | 107 | 20.011 |      |      |
|         | Total          | 2142.050 | 108 |        |      |      |
| H1H2_T9 | Between Groups | .795     | 1   | .795   | .037 | .847 |
|         | Within Groups  | 2276.646 | 107 | 21.277 |      |      |
|         | Total          | 2277.441 | 108 |        |      |      |

**Table T10: ANOVA\_H1\*-A1\*\_M**

|         |                | Sum of Squares | df  | Mean Square | F     | Sig. |
|---------|----------------|----------------|-----|-------------|-------|------|
| H1A1_T1 | Between Groups | 6.815          | 1   | 6.815       | .067  | .796 |
|         | Within Groups  | 18939.452      | 187 | 101.280     |       |      |
|         | Total          | 18946.267      | 188 |             |       |      |
| H1A1_T2 | Between Groups | .087           | 1   | .087        | .001  | .973 |
|         | Within Groups  | 14442.258      | 187 | 77.231      |       |      |
|         | Total          | 14442.345      | 188 |             |       |      |
| H1A1_T3 | Between Groups | 55.355         | 1   | 55.355      | 1.002 | .318 |
|         | Within Groups  | 10330.316      | 187 | 55.242      |       |      |
|         | Total          | 10385.670      | 188 |             |       |      |
| H1A1_T4 | Between Groups | 101.118        | 1   | 101.118     | 2.312 | .130 |
|         | Within Groups  | 8179.186       | 187 | 43.739      |       |      |
|         | Total          | 8280.304       | 188 |             |       |      |
| H1A1_T5 | Between Groups | 154.448        | 1   | 154.448     | 3.804 | .053 |
|         | Within Groups  | 7593.079       | 187 | 40.605      |       |      |
|         | Total          | 7747.527       | 188 |             |       |      |
| H1A1_T6 | Between Groups | 108.504        | 1   | 108.504     | 2.498 | .116 |
|         | Within Groups  | 8121.609       | 187 | 43.431      |       |      |
|         | Total          | 8230.114       | 188 |             |       |      |
| H1A1_T7 | Between Groups | 35.892         | 1   | 35.892      | .887  | .347 |

|         |                |           |     |        |      |      |
|---------|----------------|-----------|-----|--------|------|------|
|         | Within Groups  | 7563.744  | 187 | 40.448 |      |      |
|         | Total          | 7599.636  | 188 |        |      |      |
| H1A1_T8 | Between Groups | 25.167    | 1   | 25.167 | .504 | .479 |
|         | Within Groups  | 9338.980  | 187 | 49.941 |      |      |
|         | Total          | 9364.147  | 188 |        |      |      |
| H1A1_T9 | Between Groups | 6.721     | 1   | 6.721  | .126 | .723 |
|         | Within Groups  | 10005.259 | 187 | 53.504 |      |      |
|         | Total          | 10011.979 | 188 |        |      |      |

**Table T11: ANOVA\_H1\*-A2\*\_M**

|         |                | Sum of Squares | df  | Mean Square | F      | Sig. |
|---------|----------------|----------------|-----|-------------|--------|------|
| H1A2_T1 | Between Groups | 47.829         | 1   | 47.829      | .542   | .462 |
|         | Within Groups  | 16492.495      | 187 | 88.195      |        |      |
|         | Total          | 16540.324      | 188 |             |        |      |
| H1A2_T2 | Between Groups | 243.669        | 1   | 243.669     | 3.198  | .075 |
|         | Within Groups  | 14249.384      | 187 | 76.200      |        |      |
|         | Total          | 14493.053      | 188 |             |        |      |
| H1A2_T3 | Between Groups | 534.312        | 1   | 534.312     | 6.714  | .010 |
|         | Within Groups  | 14881.400      | 187 | 79.580      |        |      |
|         | Total          | 15415.712      | 188 |             |        |      |
| H1A2_T4 | Between Groups | 936.918        | 1   | 936.918     | 10.956 | .001 |
|         | Within Groups  | 15992.025      | 187 | 85.519      |        |      |
|         | Total          | 16928.943      | 188 |             |        |      |
| H1A2_T5 | Between Groups | 1367.298       | 1   | 1367.298    | 14.485 | .000 |
|         | Within Groups  | 17652.094      | 187 | 94.396      |        |      |
|         | Total          | 19019.392      | 188 |             |        |      |
| H1A2_T6 | Between Groups | 1260.902       | 1   | 1260.902    | 13.720 | .000 |
|         | Within Groups  | 17185.859      | 187 | 91.903      |        |      |
|         | Total          | 18446.761      | 188 |             |        |      |

|         |                |           |     |         |       |      |
|---------|----------------|-----------|-----|---------|-------|------|
| H1A2_T7 | Between Groups | 555.370   | 1   | 555.370 | 7.061 | .009 |
|         | Within Groups  | 14707.391 | 187 | 78.649  |       |      |
|         | Total          | 15262.761 | 188 |         |       |      |
| H1A2_T8 | Between Groups | 333.544   | 1   | 333.544 | 3.923 | .059 |
|         | Within Groups  | 15899.149 | 187 | 85.022  |       |      |
|         | Total          | 16232.693 | 188 |         |       |      |
| H1A2_T9 | Between Groups | 108.541   | 1   | 108.541 | 1.293 | .257 |
|         | Within Groups  | 15694.632 | 187 | 83.929  |       |      |
|         | Total          | 15803.173 | 188 |         |       |      |

**Table T12: ANOVA\_H1\*-A3\*\_M**

|         |                | Sum of Squares | df  | Mean Square | F     | Sig. |
|---------|----------------|----------------|-----|-------------|-------|------|
| H1A3_T1 | Between Groups | .078           | 1   | .078        | .001  | .979 |
|         | Within Groups  | 20662.791      | 187 | 110.496     |       |      |
|         | Total          | 20662.870      | 188 |             |       |      |
| H1A3_T2 | Between Groups | 19.059         | 1   | 19.059      | .211  | .646 |
|         | Within Groups  | 16875.558      | 187 | 90.244      |       |      |
|         | Total          | 16894.617      | 188 |             |       |      |
| H1A3_T3 | Between Groups | 225.370        | 1   | 225.370     | 2.527 | .114 |
|         | Within Groups  | 16676.325      | 187 | 89.178      |       |      |
|         | Total          | 16901.694      | 188 |             |       |      |
| H1A3_T4 | Between Groups | 567.303        | 1   | 567.303     | 5.292 | .063 |
|         | Within Groups  | 20046.601      | 187 | 107.201     |       |      |
|         | Total          | 20613.905      | 188 |             |       |      |
| H1A3_T5 | Between Groups | 868.909        | 1   | 868.909     | 6.889 | .509 |
|         | Within Groups  | 23587.751      | 187 | 126.138     |       |      |
|         | Total          | 24456.660      | 188 |             |       |      |
| H1A3_T6 | Between Groups | 790.287        | 1   | 790.287     | 6.134 | .114 |
|         | Within Groups  | 24093.953      | 187 | 128.845     |       |      |

|         |                |           |     |         |       |      |
|---------|----------------|-----------|-----|---------|-------|------|
|         | Total          | 24884.240 | 188 |         |       |      |
| H1A3_T7 | Between Groups | 611.727   | 1   | 611.727 | 5.051 | .265 |
|         | Within Groups  | 22645.750 | 187 | 121.100 |       |      |
|         | Total          | 23257.477 | 188 |         |       |      |
| H1A3_T8 | Between Groups | 467.426   | 1   | 467.426 | 4.318 | .391 |
|         | Within Groups  | 20244.589 | 187 | 108.260 |       |      |
|         | Total          | 20712.015 | 188 |         |       |      |
| H1A3_T9 | Between Groups | 72.126    | 1   | 72.126  | .785  | .377 |
|         | Within Groups  | 17191.317 | 187 | 91.932  |       |      |
|         | Total          | 17263.443 | 188 |         |       |      |

Tables T13-T24 describe the output of the statistical models.

**Table T13: CPP**

Residuals:

|          |         |        |        |         |
|----------|---------|--------|--------|---------|
| Min      | 1Q      | Median | 3Q     | Max     |
| -12.8048 | -1.9346 | 0.2094 | 2.0505 | 10.7919 |

Coefficients:

|                | Estimate | Std. Error | t value | Pr(> t ) |     |
|----------------|----------|------------|---------|----------|-----|
| (Intercept)    | 19.27608 | 0.34909    | 55.219  | < 2e-16  | *** |
| ToneT          | -0.98909 | 0.14812    | -6.678  | 3.28e-11 | *** |
| GenderM        | 0.08881  | 0.44944    | 0.198   | 0.843376 |     |
| TimeT2         | 4.69857  | 0.48355    | 9.717   | < 2e-16  | *** |
| TimeT3         | 7.72031  | 0.48355    | 15.966  | < 2e-16  | *** |
| TimeT4         | 9.06166  | 0.48355    | 18.740  | < 2e-16  | *** |
| TimeT5         | 10.05077 | 0.48355    | 20.785  | < 2e-16  | *** |
| TimeT6         | 10.55296 | 0.48355    | 21.824  | < 2e-16  | *** |
| TimeT7         | 10.38422 | 0.48355    | 21.475  | < 2e-16  | *** |
| TimeT8         | 9.46452  | 0.48355    | 19.573  | < 2e-16  | *** |
| TimeT9         | 8.14960  | 0.48355    | 16.854  | < 2e-16  | *** |
| GenderM:TimeT2 | -2.16335 | 0.63551    | -3.404  | 0.000679 | *** |
| GenderM:TimeT3 | -2.90418 | 0.63551    | -4.570  | 5.24e-06 | *** |
| GenderM:TimeT4 | -2.56009 | 0.63551    | -4.028  | 5.86e-05 | *** |
| GenderM:TimeT5 | -2.90725 | 0.63551    | -4.575  | 5.12e-06 | *** |
| GenderM:TimeT6 | -3.39589 | 0.63551    | -5.344  | 1.04e-07 | *** |
| GenderM:TimeT7 | -3.52532 | 0.63551    | -5.547  | 3.36e-08 | *** |
| GenderM:TimeT8 | -3.31406 | 0.63551    | -5.215  | 2.07e-07 | *** |
| GenderM:TimeT9 | -3.71415 | 0.63551    | -5.844  | 6.09e-09 | *** |

---

Signif. codes: 0 '\*\*\*' 0.001 '\*\*' 0.01 '.' 0.1 ' ' 1

Residual standard error: 3.058 on 1691 degrees of freedom  
Multiple R-squared: 0.5061, Adjusted R-squared: 0.5008  
F-statistic: 96.25 on 18 and 1691 DF, p-value: < 2.2e-16

**Table T14: Energy**

Residuals:

| Min      | 1Q      | Median | 3Q     | Max     |
|----------|---------|--------|--------|---------|
| -212.273 | -37.296 | 7.952  | 42.188 | 199.003 |

Coefficients:

|                | Estimate | Std. Error | t value | Pr(> t ) |     |
|----------------|----------|------------|---------|----------|-----|
| (Intercept)    | 129.716  | 6.854      | 18.925  | <2e-16   | *** |
| ToneL          | 3.433    | 2.917      | 1.177   | 0.2393   |     |
| GenderM        | 75.511   | 8.841      | 8.541   | <2e-16   | *** |
| TimeT2         | 9.313    | 9.493      | 0.981   | 0.3267   |     |
| TimeT3         | 9.526    | 9.493      | 1.003   | 0.3158   |     |
| TimeT4         | 9.006    | 9.493      | 0.949   | 0.3429   |     |
| TimeT5         | 8.554    | 9.493      | 0.901   | 0.3677   |     |
| TimeT6         | 5.813    | 9.493      | 0.612   | 0.5404   |     |
| TimeT7         | 2.882    | 9.493      | 0.304   | 0.7615   |     |
| TimeT8         | -2.936   | 9.493      | -0.309  | 0.7572   |     |
| TimeT9         | -22.331  | 9.493      | -2.352  | 0.0188   | *   |
| GenderM:TimeT2 | 5.279    | 12.501     | 0.422   | 0.6729   |     |
| GenderM:TimeT3 | 9.869    | 12.501     | 0.789   | 0.4299   |     |
| GenderM:TimeT4 | 11.583   | 12.501     | 0.927   | 0.3543   |     |
| GenderM:TimeT5 | 9.965    | 12.501     | 0.797   | 0.4255   |     |
| GenderM:TimeT6 | 8.167    | 12.501     | 0.653   | 0.5136   |     |
| GenderM:TimeT7 | 2.473    | 12.501     | 0.198   | 0.8432   |     |
| GenderM:TimeT8 | -7.238   | 12.501     | -0.579  | 0.5627   |     |
| GenderM:TimeT9 | -11.934  | 12.501     | -0.955  | 0.3399   |     |

---

Signif. codes: 0 '\*\*\*' 0.001 '\*\*' 0.01 '\*' 0.05 '.' 0.1 ' ' 1

Residual standard error: 60.04 on 1682 degrees of freedom  
Multiple R-squared: 0.3263, Adjusted R-squared: 0.3191  
F-statistic: 45.25 on 18 and 1682 DF, p-value: < 2.2e-16

**Table T15: H1\*-H2\***

Residuals:

| Min      | 1Q      | Median  | 3Q     | Max     |
|----------|---------|---------|--------|---------|
| -16.5514 | -2.6607 | -0.4034 | 2.3934 | 13.2644 |

Coefficients:

|             | Estimate | Std. Error | t value | Pr(> t ) |     |
|-------------|----------|------------|---------|----------|-----|
| (Intercept) | 3.6731   | 0.4762     | 7.713   | 2.08e-14 | *** |
| ToneL       | 0.9643   | 0.2017     | 4.780   | 1.90e-06 | *** |
| GenderM     | -1.6470  | 0.6115     | -2.694  | 0.00714  | **  |
| TimeT2      | -1.4874  | 0.6566     | -2.265  | 0.02362  | *   |
| TimeT3      | -1.5655  | 0.6566     | -2.384  | 0.01722  | *   |

|                |         |        |        |         |
|----------------|---------|--------|--------|---------|
| TimeT4         | -0.8445 | 0.6566 | -1.286 | 0.19853 |
| TimeT5         | -0.4125 | 0.6566 | -0.628 | 0.52991 |
| TimeT6         | -0.3387 | 0.6566 | -0.516 | 0.60604 |
| TimeT7         | -0.3583 | 0.6566 | -0.546 | 0.58530 |
| TimeT8         | 0.1533  | 0.6566 | 0.233  | 0.81544 |
| TimeT9         | 0.6675  | 0.6566 | 1.017  | 0.30949 |
| GenderM:TimeT2 | 1.1681  | 0.8646 | 1.351  | 0.17687 |
| GenderM:TimeT3 | 1.3935  | 0.8646 | 1.612  | 0.10720 |
| GenderM:TimeT4 | 0.7732  | 0.8646 | 0.894  | 0.37132 |
| GenderM:TimeT5 | 0.3288  | 0.8646 | 0.380  | 0.70376 |
| GenderM:TimeT6 | 0.3233  | 0.8646 | 0.374  | 0.70851 |
| GenderM:TimeT7 | 0.4529  | 0.8646 | 0.524  | 0.60048 |
| GenderM:TimeT8 | 0.0883  | 0.8646 | 0.102  | 0.91866 |
| GenderM:TimeT9 | -0.1385 | 0.8646 | -0.160 | 0.87279 |

---

Signif. codes: 0 '\*\*\*' 0.001 '\*\*' 0.01 '\*' 0.05 '.' 0.1 ' ' 1

Residual standard error: 4.153 on 1682 degrees of freedom  
Multiple R-squared: 0.04618, Adjusted R-squared: 0.03597  
F-statistic: 4.524 on 18 and 1682 DF, p-value: 8.904e-10

#### **Table T16: H1\*-A1\***

Residuals:

| Min     | 1Q     | Median | 3Q    | Max    |
|---------|--------|--------|-------|--------|
| -18.217 | -5.113 | -1.022 | 3.959 | 27.866 |

Coefficients:

|                | Estimate | Std. Error | t value | Pr(> t ) |     |
|----------------|----------|------------|---------|----------|-----|
| (Intercept)    | 20.53243 | 0.85474    | 24.022  | <2e-16   | *** |
| ToneL          | 0.78114  | 0.36370    | 2.148   | 0.0319   | *   |
| GenderM        | -0.25062 | 1.10248    | -0.227  | 0.8202   |     |
| TimeT2         | -0.67159 | 1.18383    | -0.567  | 0.5706   |     |
| TimeT3         | -0.08424 | 1.18383    | -0.071  | 0.9433   |     |
| TimeT4         | 0.11860  | 1.18383    | 0.100   | 0.9202   |     |
| TimeT5         | 0.09140  | 1.18383    | 0.077   | 0.9385   |     |
| TimeT6         | 0.09139  | 1.18383    | 0.077   | 0.9385   |     |
| TimeT7         | 0.73689  | 1.18383    | 0.622   | 0.5337   |     |
| TimeT8         | 0.76850  | 1.18383    | 0.649   | 0.5163   |     |
| TimeT9         | 1.17041  | 1.18383    | 0.989   | 0.3230   |     |
| GenderM:TimeT2 | 0.32428  | 1.55886    | 0.208   | 0.8352   |     |
| GenderM:TimeT3 | 0.35573  | 1.55886    | 0.228   | 0.8195   |     |
| GenderM:TimeT4 | 0.89315  | 1.55886    | 0.573   | 0.5668   |     |
| GenderM:TimeT5 | 1.36962  | 1.55886    | 0.879   | 0.3797   |     |
| GenderM:TimeT6 | 1.75945  | 1.55886    | 1.129   | 0.2592   |     |
| GenderM:TimeT7 | 1.15242  | 1.55886    | 0.739   | 0.4598   |     |
| GenderM:TimeT8 | 1.64117  | 1.55886    | 1.053   | 0.2926   |     |
| GenderM:TimeT9 | 1.84415  | 1.55886    | 1.183   | 0.2370   |     |

---

Signif. codes: 0 '\*\*\*' 0.001 '\*\*' 0.01 '\*' 0.05 '.' 0.1 ' ' 1

Residual standard error: 7.487 on 1682 degrees of freedom

Multiple R-squared: 0.01949, Adjusted R-squared: 0.008994  
F-statistic: 1.857 on 18 and 1682 DF, p-value: 0.01553

**Table T17: H1\*-A2\***

Residuals:

| Min     | 1Q     | Median | 3Q    | Max    |
|---------|--------|--------|-------|--------|
| -32.711 | -5.071 | -0.083 | 5.712 | 26.107 |

Coefficients:

|                | Estimate | Std. Error | t value | Pr(> t ) |     |
|----------------|----------|------------|---------|----------|-----|
| (Intercept)    | 19.8114  | 1.0328     | 19.183  | < 2e-16  | *** |
| ToneL          | 3.0505   | 0.4395     | 6.942   | 5.52e-12 | *** |
| GenderM        | 0.7680   | 1.3321     | 0.577   | 0.56432  |     |
| TimeT2         | -1.9016  | 1.4304     | -1.329  | 0.18388  |     |
| TimeT3         | -2.1583  | 1.4304     | -1.509  | 0.13151  |     |
| TimeT4         | -3.2614  | 1.4304     | -2.280  | 0.02273  | *   |
| TimeT5         | -4.2463  | 1.4304     | -2.969  | 0.00303  | **  |
| TimeT6         | -3.7525  | 1.4304     | -2.623  | 0.00878  | **  |
| TimeT7         | -2.9937  | 1.4304     | -2.093  | 0.03650  | *   |
| TimeT8         | -2.6979  | 1.4304     | -1.886  | 0.05945  | .   |
| TimeT9         | -2.0172  | 1.4304     | -1.410  | 0.15865  |     |
| GenderM:TimeT2 | 1.5853   | 1.8835     | 0.842   | 0.40009  |     |
| GenderM:TimeT3 | 1.5765   | 1.8835     | 0.837   | 0.40273  |     |
| GenderM:TimeT4 | 2.8494   | 1.8835     | 1.513   | 0.13052  |     |
| GenderM:TimeT5 | 3.9782   | 1.8835     | 2.112   | 0.03482  | *   |
| GenderM:TimeT6 | 3.7241   | 1.8835     | 1.977   | 0.04818  | *   |
| GenderM:TimeT7 | 3.6065   | 1.8835     | 1.915   | 0.05570  | .   |
| GenderM:TimeT8 | 4.0025   | 1.8835     | 2.125   | 0.03373  | *   |
| GenderM:TimeT9 | 3.8190   | 1.8835     | 2.028   | 0.04276  | *   |

---

Signif. codes: 0 '\*\*\*' 0.001 '\*\*' 0.01 '\*' 0.05 '.' 0.1 ' ' 1

Residual standard error: 9.047 on 1682 degrees of freedom  
Multiple R-squared: 0.07606, Adjusted R-squared: 0.06617  
F-statistic: 7.692 on 18 and 1682 DF, p-value: < 2.2e-16

**Table T18: H1\*-A3\***

Residuals:

| Min     | 1Q     | Median | 3Q    | Max    |
|---------|--------|--------|-------|--------|
| -38.097 | -7.059 | -0.146 | 6.839 | 27.019 |

Coefficients:

|             | Estimate | Std. Error | t value | Pr(> t ) |     |
|-------------|----------|------------|---------|----------|-----|
| (Intercept) | 15.8903  | 1.1881     | 13.375  | < 2e-16  | *** |
| ToneL       | 2.5814   | 0.5055     | 5.106   | 3.66e-07 | *** |
| GenderM     | -2.8483  | 1.5324     | -1.859  | 0.0632   | .   |
| TimeT2      | -1.1137  | 1.6455     | -0.677  | 0.4986   |     |
| TimeT3      | -1.4974  | 1.6455     | -0.910  | 0.3629   |     |
| TimeT4      | -2.1084  | 1.6455     | -1.281  | 0.2003   |     |
| TimeT5      | -2.9666  | 1.6455     | -1.803  | 0.0716   | .   |



```

TimeT6          -2.8483      1.6455   -1.731    0.0836 .
TimeT7          -2.0129      1.6455   -1.223    0.2214
TimeT8          -1.0378      1.6455   -0.631    0.5283
TimeT9           0.2781      1.6455    0.169    0.8658
GenderM:TimeT2   0.9455      2.1668    0.436    0.6626
GenderM:TimeT3   1.3053      2.1668    0.602    0.5470
GenderM:TimeT4   1.5165      2.1668    0.700    0.4841
GenderM:TimeT5   2.2500      2.1668    1.038    0.2992
GenderM:TimeT6   2.3880      2.1668    1.102    0.2706
GenderM:TimeT7   2.4223      2.1668    1.118    0.2638
GenderM:TimeT8   2.5443      2.1668    1.174    0.2405
GenderM:TimeT9   2.4423      2.1668    1.127    0.2598
---
Signif. codes:  0 '***' 0.001 '**' 0.01 '*' 0.05 '.' 0.1 ' ' 1

Residual standard error: 10.41 on 1682 degrees of freedom
Multiple R-squared:  0.02746,    Adjusted R-squared:  0.01706
F-statistic: 2.639 on 18 and 1682 DF, p-value: 0.0002074

```

**Table 19.** Pairwise comparisons of EMMs of the vowels specified for contrastive tones (H and L) for each timepoint as derived from the model f0 for male (M) and female (F). Positive estimate values indicate higher values of the first element in the comparison.

| V_portio<br>n | Contrast | Estimate (in<br>ratio) | t value (in<br>ratio) | p value |
|---------------|----------|------------------------|-----------------------|---------|
| T1            | H_F vs.  | 1.15                   | 24.259                | <0.0001 |
|               | L_F      |                        |                       | *       |
|               | H_M vs.  | 1.23                   | 23.705                | <0.0001 |
|               | L_M      |                        |                       | *       |
| T2            | H_F vs.  | 1.15                   | 24.195                | <0.0001 |
|               | L_F      |                        |                       | *       |
|               | H_M vs.  | 1.23                   | 23.691                | <0.0001 |
|               | L_M      |                        |                       | *       |
| T3            | H_F vs.  | 1.16                   | 24.152                | <0.0001 |
|               | L_F      |                        |                       | *       |
|               | H_M vs.  | 1.23                   | 23.690                | <0.0001 |
|               | L_M      |                        |                       | *       |
| T4            | H_F vs.  | 1.16                   | 24.128                | <0.0001 |
|               | L_F      |                        |                       | *       |
|               | H_M vs.  | 1.23                   | 23.699                | <0.0001 |
|               | L_M      |                        |                       | *       |
| T5            | H_F vs.  | 1.16                   | 24.123                | <0.0001 |
|               | L_F      |                        |                       | *       |
|               | H_M vs.  | 1.23                   | 23.724                | <0.0001 |
|               | L_M      |                        |                       | *       |
| T6            | H_F vs.  | 1.16                   | 24.134                | <0.0001 |
|               | L_F      |                        |                       | *       |
|               | H_M vs.  | 1.23                   | 23.759                | <0.0001 |
|               | L_M      |                        |                       | *       |

|    |         |      |        |         |
|----|---------|------|--------|---------|
| T7 | H_F vs. | 1.16 | 24.152 | <0.0001 |
|    | L_F     |      |        | *       |
|    | H_M vs. | 1.23 | 23.795 | <0.0001 |
|    | L_M     |      |        | *       |
| T8 | H_F vs. | 1.16 | 24.174 | <0.0001 |
|    | L_F     |      |        | *       |
|    | H_M vs. | 1.22 | 23.830 | <0.0001 |
|    | L_M     |      |        | *       |
| T9 | H_F vs. | 1.16 | 24.167 | <0.0001 |
|    | L_F     |      |        | *       |
|    | H_M vs. | 1.22 | 23.837 | <0.0001 |
|    | L_M     |      |        | *       |

**Table 20.** Pairwise comparisons of EMMs of the vowels specified for contrastive tones (H and L) for each timepoint as derived from the model CPP for male (M) and female (F). Positive estimate values indicate higher values of the first element in the comparison.

| V_portio<br>n | Contrast | Estimate (in<br>ratio) | t value (in<br>ratio) | p value |
|---------------|----------|------------------------|-----------------------|---------|
| T1            | H_F vs.  | 1.054                  | 6.617                 | <0.0001 |
|               | L_F      |                        |                       | *       |
|               | H_M vs.  | 1.054                  | 6.649                 | <0.0001 |
|               | L_M      |                        |                       | *       |
| T2            | H_F vs.  | 1.043                  | 6.637                 | <0.0001 |
|               | L_F      |                        |                       | *       |
|               | H_M vs.  | 1.047                  | 6.656                 | <0.0001 |
|               | L_M      |                        |                       | *       |
| T3            | H_F vs.  | 1.038                  | 6.645                 | <0.0001 |
|               | L_F      |                        |                       | *       |
|               | H_M vs.  | 1.043                  | 6.661                 | <0.0001 |
|               | L_M      |                        |                       | *       |
| T4            | H_F vs.  | 1.036                  | 6.648                 | <0.0001 |
|               | L_F      |                        |                       | *       |
|               | H_M vs.  | 1.040                  | 6.663                 | <0.0001 |
|               | L_M      |                        |                       | *       |
| T5            | H_F vs.  | 1.035                  | 6.650                 | <0.0001 |
|               | L_F      |                        |                       | *       |
|               | H_M vs.  | 1.039                  | 6.664                 | <0.0001 |
|               | L_M      |                        |                       | *       |
| T6            | H_F vs.  | 1.034                  | 6.651                 | <0.0001 |
|               | L_F      |                        |                       | *       |
|               | H_M vs.  | 1.039                  | 6.664                 | <0.0001 |
|               | L_M      |                        |                       | *       |
| T7            | H_F vs.  | 1.034                  | 6.650                 | <0.0001 |
|               | L_F      |                        |                       | *       |
|               | H_M vs.  | 1.039                  | 6.664                 | <0.0001 |
|               | L_M      |                        |                       | *       |
| T8            | H_F vs.  | 1.036                  | 6.649                 | <0.0001 |
|               | L_F      |                        |                       | *       |
|               | H_M vs.  | 1.040                  | 6.663                 | <0.0001 |
|               | L_M      |                        |                       | *       |

|    |         |       |       |         |
|----|---------|-------|-------|---------|
| T9 | H_F vs. | 1.037 | 6.646 | <0.0001 |
|    | L_F     |       |       | *       |
|    | H_M vs. | 1.043 | 6.660 | <0.0001 |
|    | L_M     |       |       | *       |

**Table 21.** Pairwise comparisons of EMMs of the vowels specified for contrastive tones (H and L) for each timepoint as derived from the model H1\*-H2\* for male (M) and female (F). Positive estimate values indicate higher values of the first element in the comparison, whereas the negative estimate values indicate lower values of the first element.

| V_portio<br>n | Contrast | Estimate (in<br>ratio) | t value (in<br>ratio) | p<br>value |
|---------------|----------|------------------------|-----------------------|------------|
| T1            | H_F vs.  | 0.792                  | -4.160                | 0.0002     |
|               | L_F      |                        |                       | *          |
|               | H_M vs.  | 0.678                  | -3.744                | 0.0011     |
|               | L_M      |                        |                       | *          |
| T2            | H_F vs.  | 0.694                  | -3.575                | 0.0020     |
|               | L_F      |                        |                       | *          |
|               | H_M vs.  | 0.639                  | -3.519                | 0.0025     |
|               | L_M      |                        |                       | *          |
| T3            | H_F vs.  | 0.686                  | -3.526                | 0.0024     |
|               | L_F      |                        |                       | *          |
|               | H_M vs.  | 0.658                  | -3.630                | 0.0017     |
|               | L_M      |                        |                       | *          |
| T4            | H_F vs.  | 0.746                  | -3.895                | 0.0006     |
|               | L_F      |                        |                       | *          |
|               | H_M vs.  | 0.670                  | -3.699                | 0.0013     |
|               | L_M      |                        |                       | *          |
| T5            | H_F vs.  | 0.772                  | -4.047                | 0.0003     |
|               | L_F      |                        |                       | *          |
|               | H_M vs.  | 0.668                  | -3.691                | 0.0013     |
|               | L_M      |                        |                       | *          |
| T6            | H_F vs.  | 0.776                  | -4.069                | 0.0003     |
|               | L_F      |                        |                       | *          |
|               | H_M vs.  | 0.676                  | -3.735                | 0.0011     |
|               | L_M      |                        |                       | *          |
| T7            | H_F vs.  | 0.775                  | -4.063                | 0.0003     |
|               | L_F      |                        |                       | *          |
|               | H_M vs.  | 0.687                  | -3.801                | 0.0009     |
|               | L_M      |                        |                       | *          |
| T8            | H_F vs.  | 0.799                  | -4.196                | 0.0002     |
|               | L_F      |                        |                       | *          |
|               | H_M vs.  | 0.702                  | -3.880                | 0.0006     |
|               | L_M      |                        |                       | *          |
| T9            | H_F vs.  | 0.818                  | -4.296                | 0.0001     |
|               | L_F      |                        |                       | *          |
|               | H_M vs.  | 0.726                  | -4.013                | 0.0004     |
|               | L_M      |                        |                       | *          |

**Table 22.** Pairwise comparisons of EMMs of the vowels specified for contrastive tones (H and L) for each timepoint as derived from the model H1\*-A1\* for male (M) and female (F). Positive estimate values indicate higher values of the first element in the comparison, whereas the negative estimate values indicate lower values of the first element.

| V_portio<br>n | Contrast | Estimate (in<br>ratio) | t value (in<br>ratio) | p<br>value |
|---------------|----------|------------------------|-----------------------|------------|
| T1            | H_F vs.  | 0.963                  | -2.141                | 0.1405     |
|               | L_F      |                        |                       |            |
|               | H_M vs.  | 0.963                  | -2.139                | 0.1413     |
|               | L_M      |                        |                       |            |
| T2            | H_F vs.  | 0.962                  | -2.141                | 0.1407     |
|               | L_F      |                        |                       |            |
|               | H_M vs.  | 0.962                  | -2.138                | 0.1414     |
|               | L_M      |                        |                       |            |
| T3            | H_F vs.  | 0.963                  | -2.141                | 0.1406     |
|               | L_F      |                        |                       |            |
|               | H_M vs.  | 0.963                  | -2.139                | 0.1413     |
|               | L_M      |                        |                       |            |
| T4            | H_F vs.  | 0.964                  | -2.141                | 0.1405     |
|               | L_F      |                        |                       |            |
|               | H_M vs.  | 0.965                  | -2.139                | 0.1411     |
|               | L_M      |                        |                       |            |
| T5            | H_F vs.  | 0.964                  | -2.141                | 0.1405     |
|               | L_F      |                        |                       |            |
|               | H_M vs.  | 0.965                  | -2.140                | 0.1410     |
|               | L_M      |                        |                       |            |
| T6            | H_F vs.  | 0.964                  | -2.141                | 0.1405     |
|               | L_F      |                        |                       |            |
|               | H_M vs.  | 0.966                  | -2.140                | 0.1410     |
|               | L_M      |                        |                       |            |
| T7            | H_F vs.  | 0.965                  | -2.142                | 0.1404     |
|               | L_F      |                        |                       |            |
|               | H_M vs.  | 0.966                  | -2.140                | 0.1410     |
|               | L_M      |                        |                       |            |
| T8            | H_F vs.  | 0.964                  | -2.141                | 0.1404     |
|               | L_F      |                        |                       |            |
|               | H_M vs.  | 0.967                  | -2.141                | 0.1409     |
|               | L_M      |                        |                       |            |
| T9            | H_F vs.  | 0.965                  | -2.141                | 0.1403     |
|               | L_F      |                        |                       |            |
|               | H_M vs.  | 0.968                  | -2.141                | 0.1408     |
|               | L_M      |                        |                       |            |

**Table 23.** Pairwise comparisons of EMMs of the vowels specified for contrastive tones (H and L) for each timepoint as derived from the model H1\*-A2\* for male (M) and female (F). Positive estimate values indicate higher values of the first element in the comparison, whereas the negative estimate values indicate lower values of the first element.

| V_portio<br>n | Contrast | Estimate (in<br>ratio) | t value (in<br>ratio) | p value |
|---------------|----------|------------------------|-----------------------|---------|
| T1            | H_F vs.  | 0.867                  | -6.593                | <0.0001 |
|               | L_F      |                        |                       | *       |
|               | H_M vs.  | 0.871                  | -6.649                | <0.0001 |
|               | L_M      |                        |                       | *       |
| T2            | H_F vs.  | 0.854                  | -6.524                | <0.0001 |
|               | L_F      |                        |                       | *       |
|               | H_M vs.  | 0.869                  | -6.642                | <0.0001 |
|               | L_M      |                        |                       | *       |
| T3            | H_F vs.  | 0.853                  | -6.514                | <0.0001 |
|               | L_F      |                        |                       | *       |
|               | H_M vs.  | 0.868                  | -6.635                | <0.0001 |
|               | L_M      |                        |                       | *       |
| T4            | H_F vs.  | 0.844                  | -6.464                | <0.0001 |
|               | L_F      |                        |                       | *       |
|               | H_M vs.  | 0.869                  | -6.639                | <0.0001 |
|               | L_M      |                        |                       | *       |
| T5            | H_F vs.  | 0.836                  | -6.411                | <0.0001 |
|               | L_F      |                        |                       | *       |
|               | H_M vs.  | 0.869                  | -6.643                | <0.0001 |
|               | L_M      |                        |                       | *       |
| T6            | H_F vs.  | 0.840                  | -6.438                | <0.0001 |
|               | L_F      |                        |                       | *       |
|               | H_M vs.  | 0.871                  | -6.649                | <0.0001 |
|               | L_M      |                        |                       | *       |
| T7            | H_F vs.  | 0.846                  | -6.476                | <0.0001 |
|               | L_F      |                        |                       | *       |
|               | H_M vs.  | 0.874                  | -6.663                | <0.0001 |
|               | L_M      |                        |                       | *       |
| T8            | H_F vs.  | 0.849                  | -6.490                | <0.0001 |
|               | L_F      |                        |                       | *       |
|               | H_M vs.  | 0.878                  | -6.678                | <0.0001 |
|               | L_M      |                        |                       | *       |
| T9            | H_F vs.  | 0.854                  | -6.520                | <0.0001 |
|               | L_F      |                        |                       | *       |
|               | H_M vs.  | 0.880                  | -6.688                | <0.0001 |
|               | L_M      |                        |                       | *       |

**Table 24.** Pairwise comparisons of EMMs of the vowels specified for contrastive tones (H and L) for each timepoint as derived from the model H1\*-A3\* for male (M) and female (F). Positive estimate values indicate higher values of the first element in the comparison, whereas the negative estimate values indicate lower values of the first element.

| V_portio<br>n | Contrast | Estimate (in<br>ratio) | t value (in<br>ratio) | p value |
|---------------|----------|------------------------|-----------------------|---------|
| T1            | H_F vs.  | 0.860                  | -4.824                | <0.0001 |
|               | L_F      |                        |                       | *       |
|               | H_M vs.  | 0.835                  | -4.761                | <0.0001 |
|               | L_M      |                        |                       | *       |

|    |     |     |       |        |         |
|----|-----|-----|-------|--------|---------|
| T2 | H_F | vs. | 0.851 | -4.786 | <0.0001 |
|    | L_F |     |       |        | *       |
|    | H_M | vs. | 0.833 | -4.754 | <0.0001 |
|    | L_M |     |       |        | *       |
| T3 | H_F | vs. | 0.848 | -4.771 | <0.0001 |
|    | L_F |     |       |        | *       |
|    | H_M | vs. | 0.833 | -4.753 | <0.0001 |
|    | L_M |     |       |        | *       |
| T4 | H_F | vs. | 0.842 | -4.745 | <0.0001 |
|    | L_F |     |       |        | *       |
|    | H_M | vs. | 0.828 | -4.735 | <0.0001 |
|    | L_M |     |       |        | *       |
| T5 | H_F | vs. | 0.834 | -4.704 | <0.0001 |
|    | L_F |     |       |        | *       |
|    | H_M | vs. | 0.827 | -4.729 | <0.0001 |
|    | L_M |     |       |        | *       |
| T6 | H_F | vs. | 0.835 | -4.710 | <0.0001 |
|    | L_F |     |       |        | *       |
|    | H_M | vs. | 0.830 | -4.741 | <0.0001 |
|    | L_M |     |       |        | *       |
| T7 | H_F | vs. | 0.843 | -4.749 | <0.0001 |
|    | L_F |     |       |        | *       |
|    | H_M | vs. | 0.839 | -4.778 | <0.0001 |
|    | L_M |     |       |        | *       |
| T8 | H_F | vs. | 0.852 | -4.778 | <0.0001 |
|    | L_F |     |       |        | *       |
|    | H_M | vs. | 0.849 | -4.817 | <0.0001 |
|    | L_M |     |       |        | *       |
| T9 | H_F | vs. | 0.862 | -4.832 | <0.0001 |
|    | L_F |     |       |        | *       |
|    | H_M | vs. | 0.859 | -4.853 | <0.0001 |
|    | L_M |     |       |        | *       |
